# Supplementary material
Source: Springer Nature journal article supplement (https://www.springermedizin.de/resource/supplementary/12913_2010_1757_MOESM2_ESM.pdf/9528894)
Supplement: MOESM2 [file 9528894]

**Building capacity**  
Science and research  
Skilled nurses  
Research infrastructure  
National statistics  
Public education

**Promoting advocacy**  
Patient empowerment  
Managing survivorship  
Quality of life  
Metastatic disease  
Organized advocacy

**Comprehensive  
Framework for  
National Breast  
Cancer Control  
Strategies**

**Developing evidence**  
Study of local etiology  
Personalized therapy  
Developing guidelines  
International networks  
Local communication

**Removing barriers**  
Out-of-pocket costs  
Disparities in access  
High cost to payers  
Early detection  
Reimbursement
